# Supplementary material for: Correction for neutron self-shielding and gamma-ray self-absorption in prompt-gamma activation analysis for large and irregularly shaped samples
Source: Royal Society of Chemistry journal article supplement (doi:10.1039/d0ja00364f), 2020-10-22
Supplement: d0ja00364f2.pdf [file d0ja00364f2.pdf]

## Electronic Supplementary Information 3 - Correction for neutron self-shielding and gamma-ray self-absorption in prompt-gamma activation analysis for large and irregularly-shaped samples

László Szentmiklósi, Zoltán Kis, Boglárka Maróti and László Zoltán Horváth

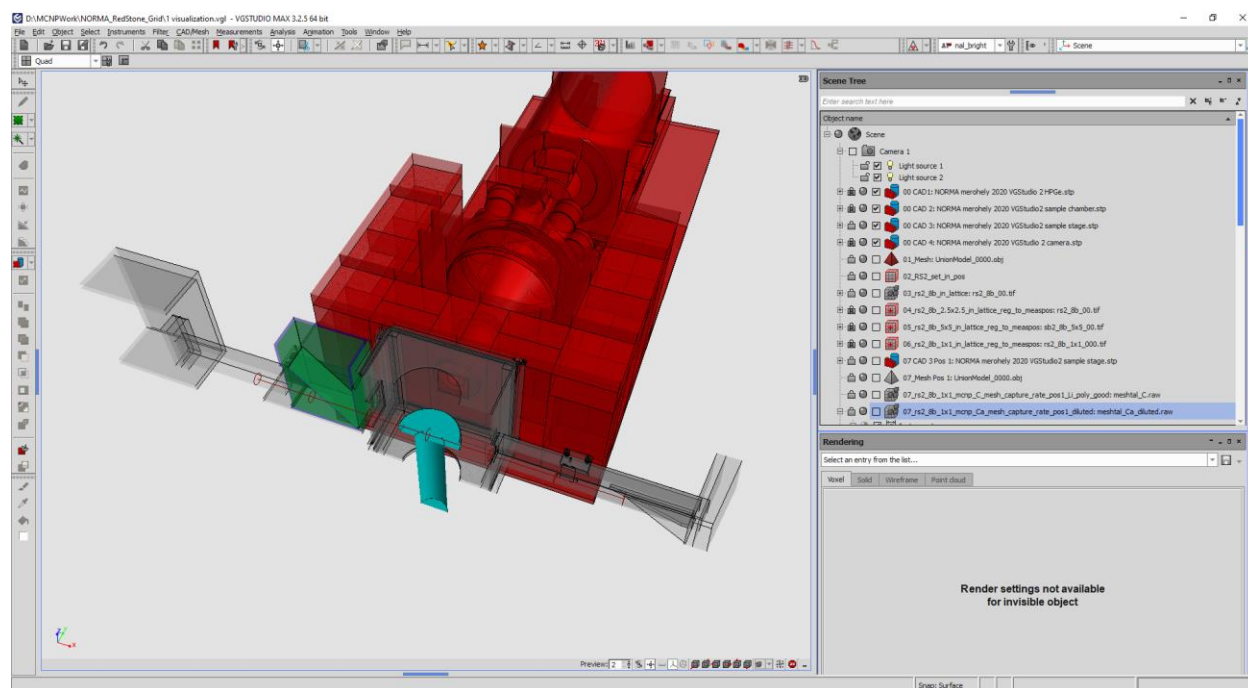

Fig 1. The CAD model of the Budapest NIPS-NORMA facility imported to VG Studio MAX 3.2

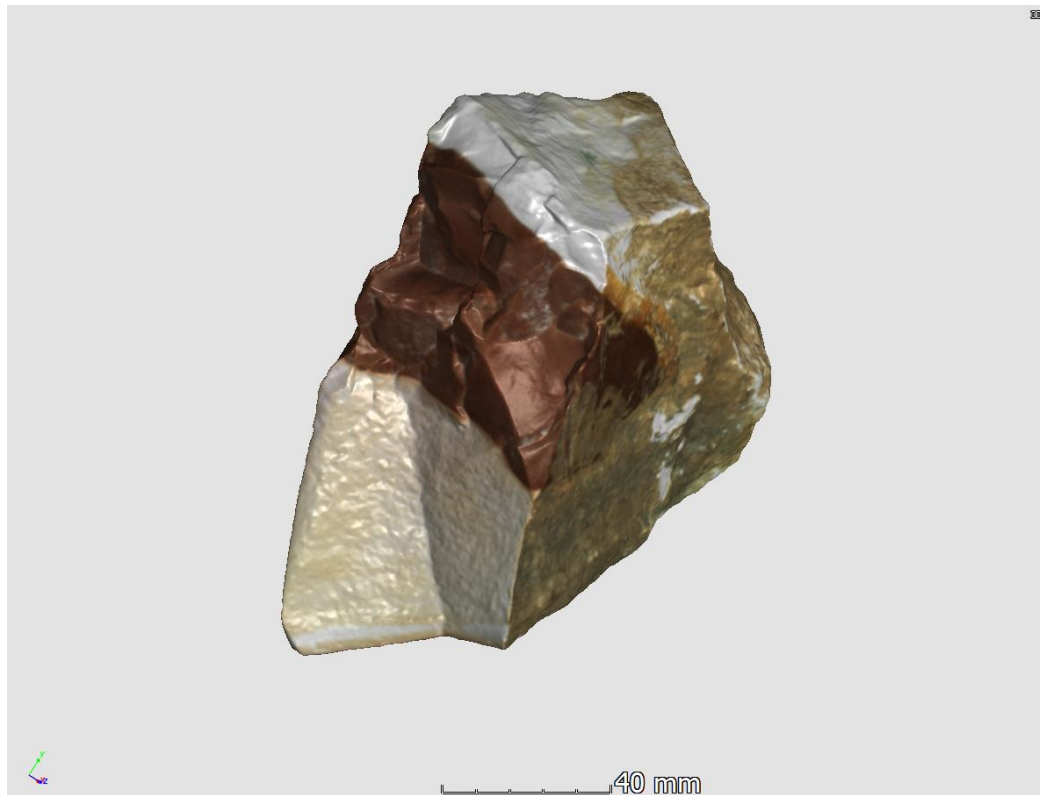

Fig 2. The photorealistic 3D model of the stone object

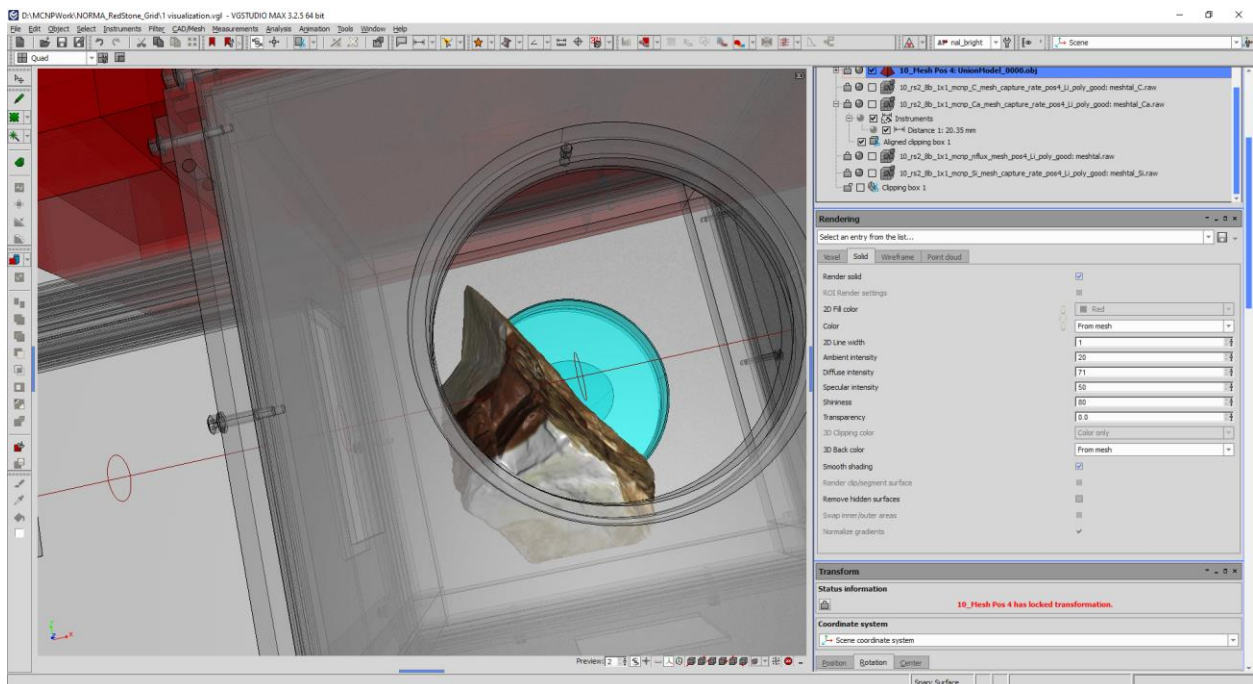

Fig 3. The virtual 3D model of the experiment including the setup and the sample placement

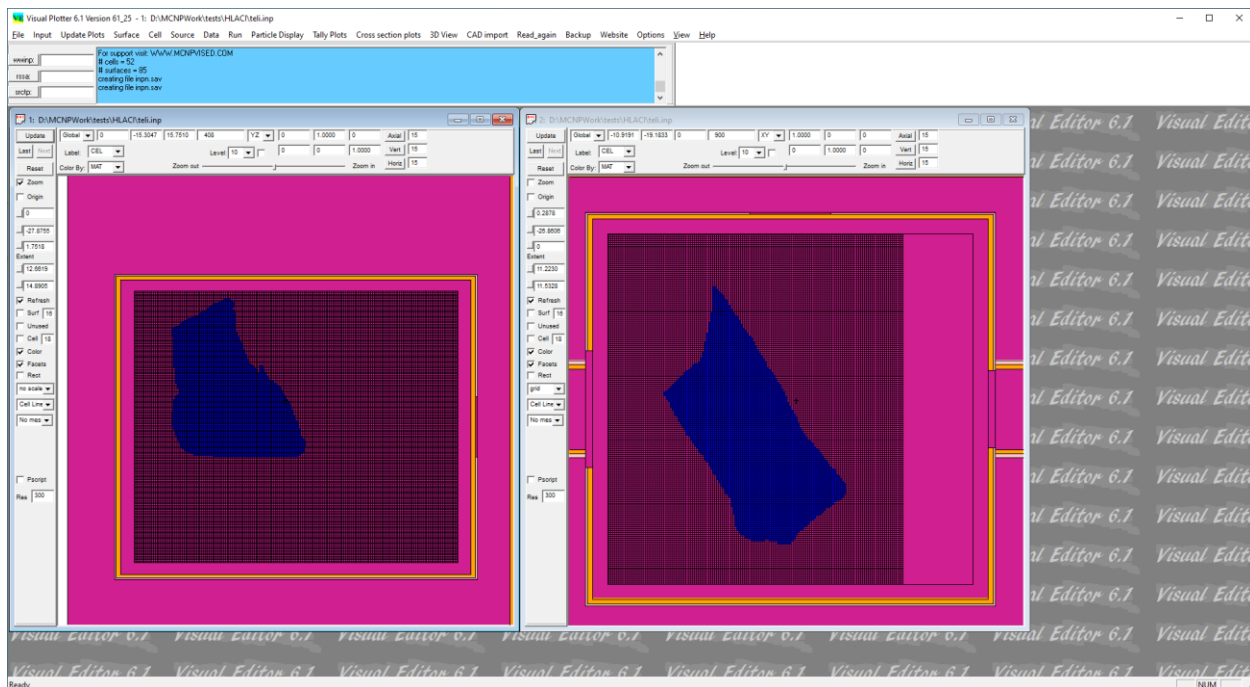

Fig 4. The model of the object in MCNP's Visual Editor

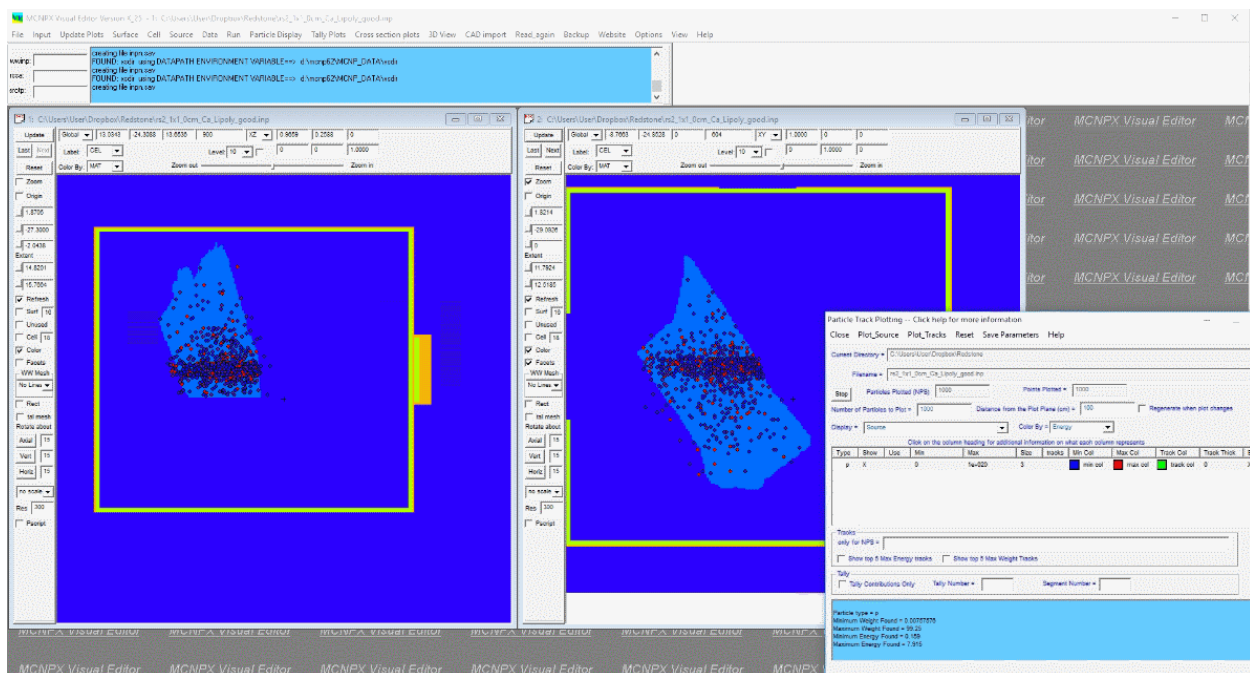

Fig 5. The generation of prompt-gamma photons in MCNP's Visual Editor

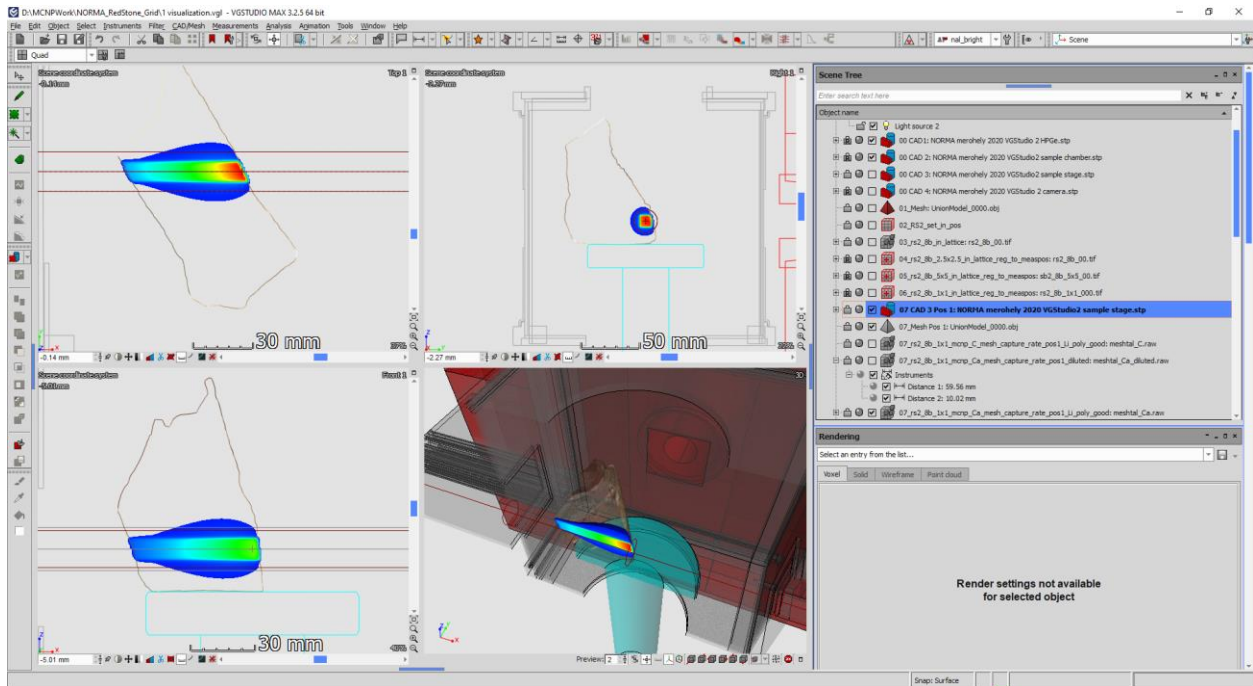

Fig 6. The neutron field at Pos 1 with real density

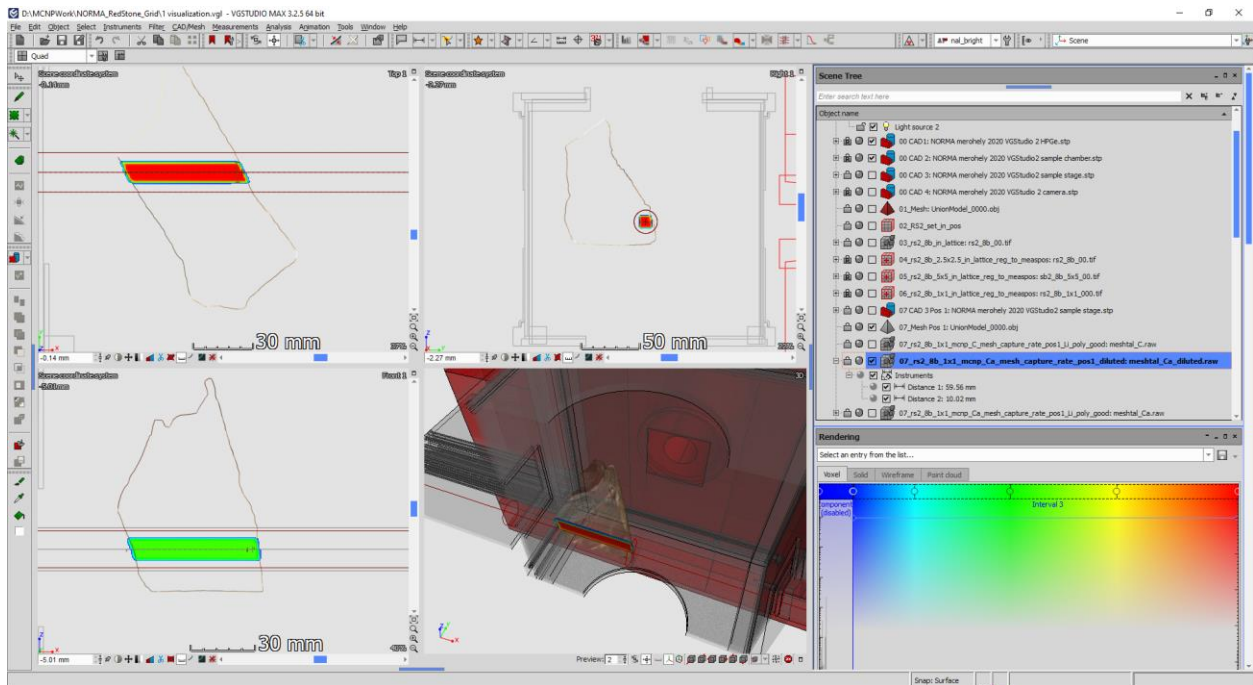

Fig 7. The neutron field at Pos 1 with diluted density



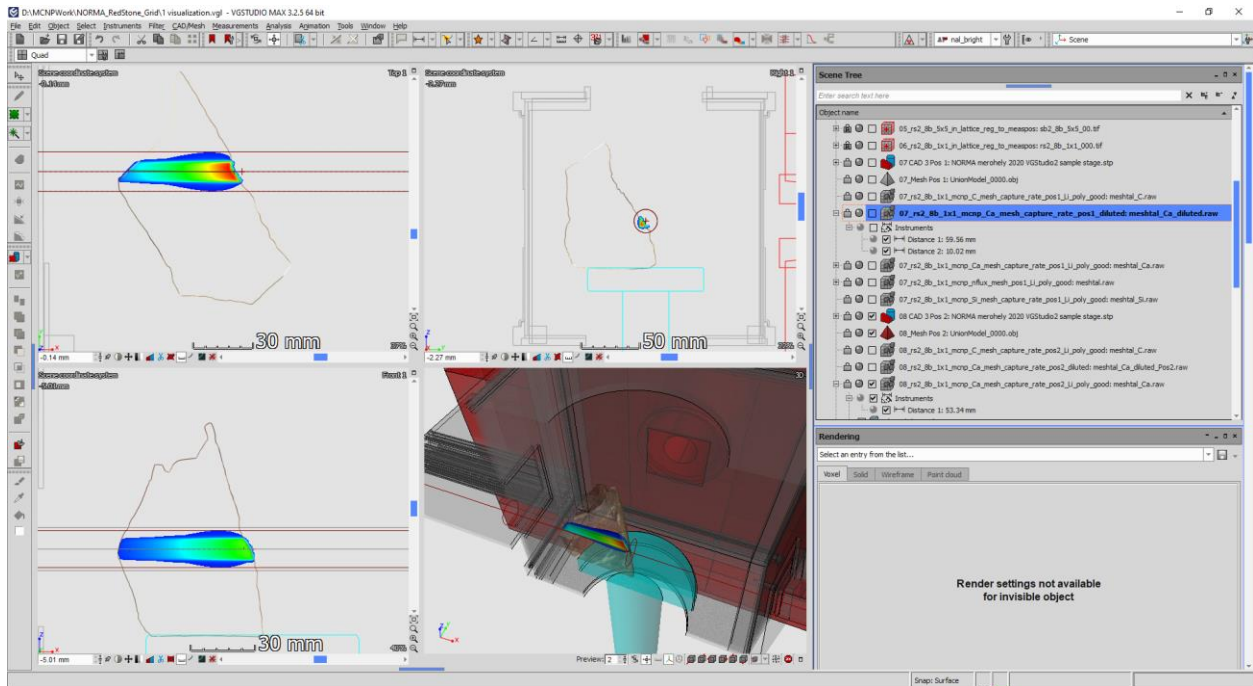

Fig 8. The neutron field at Pos 2 with real density

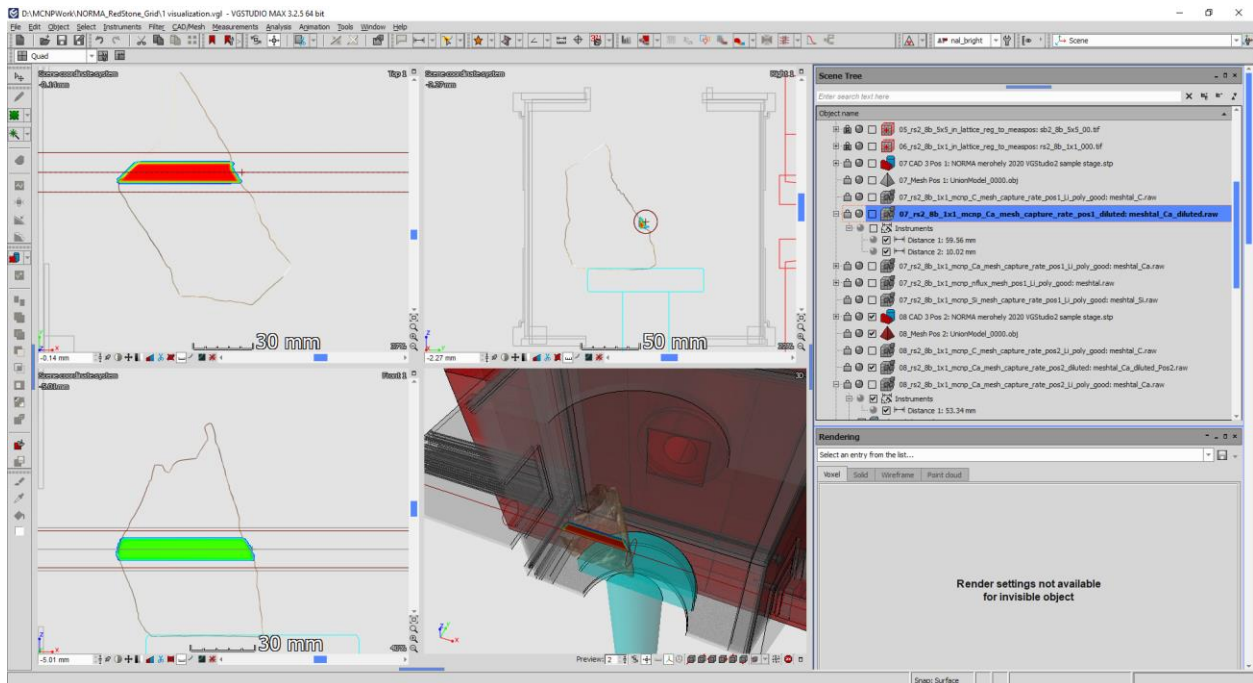

Fig 9. The neutron field at Pos 2 with diluted density

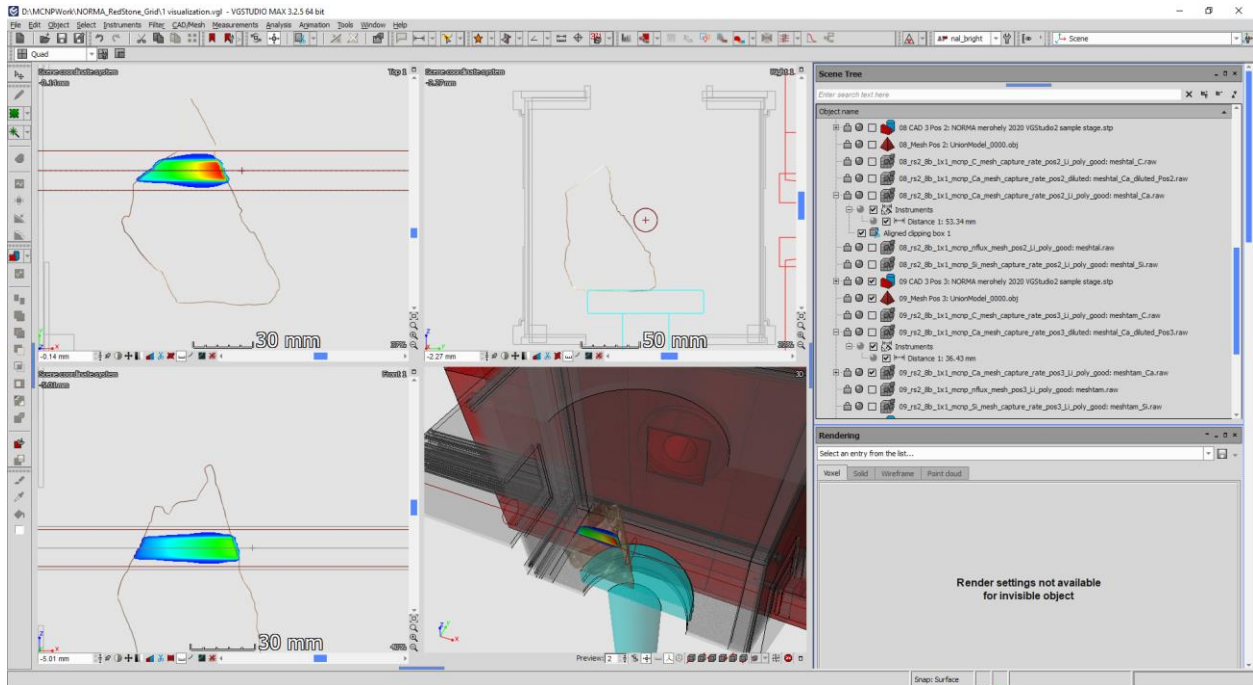

Fig 10. The neutron field at Pos 3 with real density

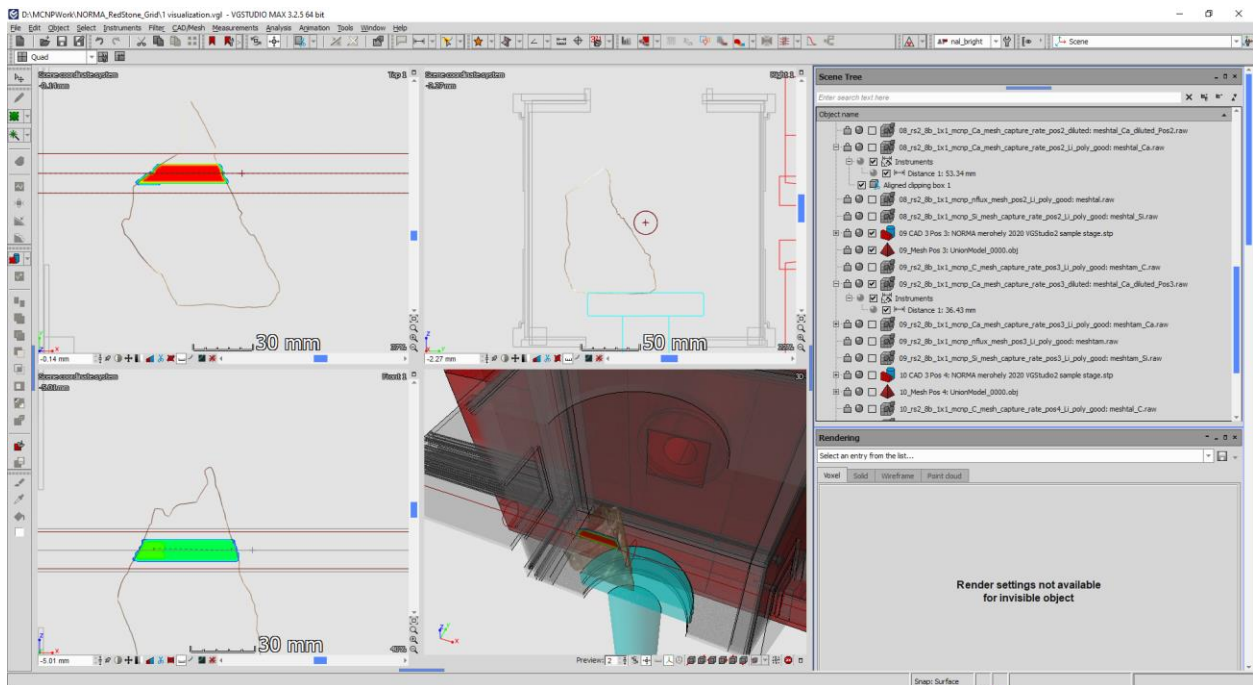

Fig 11. The neutron field at Pos 3 with diluted density

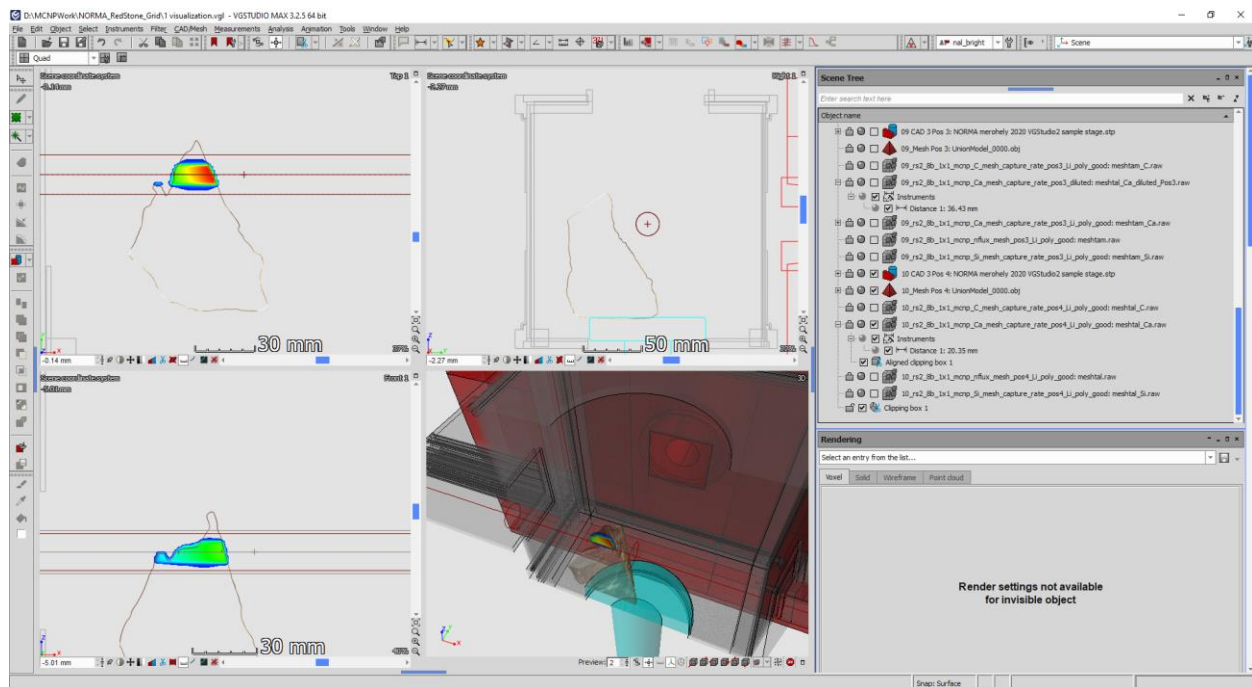

Fig 12. The neutron field at Pos 4 with real density

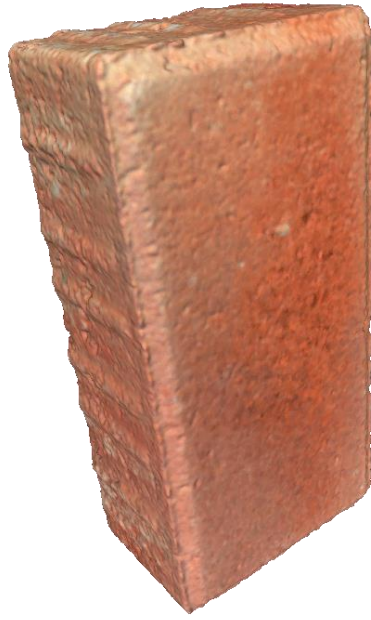

Fig 13. The photorealistic 3D model of the pavement stone object



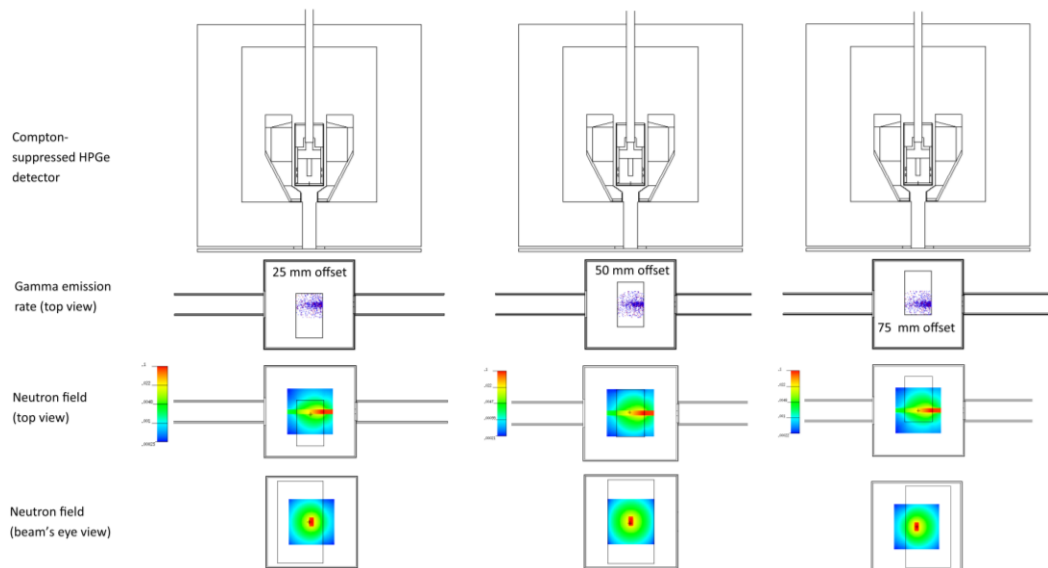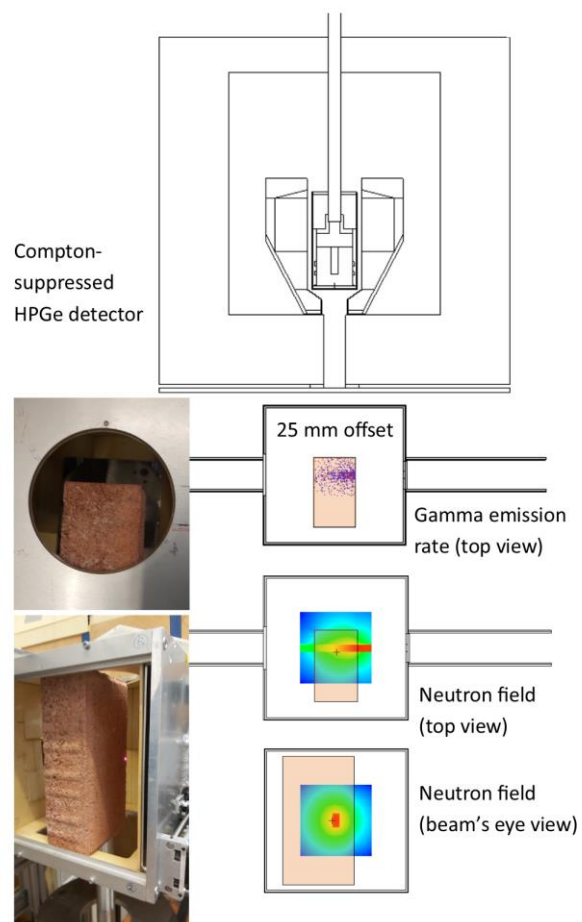

Fig 14. Neutron field plots for the pavement stone sample
